# Supplementary material for: Identification of Possible Inhibitors of SARS-CoV-2 Main Protease from some Bioactive Compounds of Artemisia annua: An in silico Approach
Source: Research Square preprint supplement (doi:10.21203/rs.3.rs-612899/v2), 2021-08-23
Supplement: Supplementary file 1 [file a4090452902aee372c07ffd2.docx]

**Identification of Possible Inhibitors of SARS-CoV-2 Main Protease from some Bioactive Compounds of *Artemisia Annua*: An in silico Approach**

**Titilayo Omolara Johnson*a, Abayomi Emmanuel Adegboyegaa, Oluwafemi Adeleke Ojob, Amina Yusuf Jegac, Opeyemi Iwaloyed, Chinenye Jane Ugwah-Oguejiofore, Rita Onyekachukwu Asomaduf, Ifeoma Felicia Chukwumaf, Stephen Adakole Ejembia, Emmanuel Ike Ugwujag**

1. Department of Biochemistry, Faculty of Basic Medical Sciences, University of Jos, Jos, Nigeria.
2. Medicinal Biochemistry and Toxicology Research Group, Department of Biochemistry, Landmark University, Omu-Aran, Nigeria.
3. Department of Pharmaceutical and Medicinal Chemistry, Faculty of Pharmaceutical Sciences Usmanu Danfodiyo University, Sokoto, Nigeria.
4. Bioinformatics and Molecular Biology Unit, Department of Biochemistry, Federal University of Technology, Akure, Nigeria
5. Department of Pharmacology and Toxicology, Faculty of Pharmaceutical Sciences, Usmanu Danfodiyo University, Sokoto, Nigeria.
6. Department of Biochemistry, Faculty of Biological Sciences, University of Nigeria, Nsukka, Enugu State, Nigeria.
7. Department of Biochemistry, Faculty of Science, Ebonyi State University, Abakaliki, Nigeria.

*****Corresponding author: [*titijohnson2004@yahoo.com](mailto:*titijohnson2004@yahoo.com); +234 8060775453

**Supplementary Information**

**Table S1: The docking scores (kcal/mol) and binding free energy (Δ*G*bind) MM-GBSA of 168 phytochemical constituents of Artemisia annua against SARS-CoV-2 main protease**

| Serial Number | PubChem CID | docking score | **Δ**G Bind | **Δ**G Bind Coulomb | **Δ**G Bind Covalent | **Δ**G Bind Hbond | **Δ**G Bind Lipo | **Δ**G Bind Packing | **Δ**G Bind vdW |
| --- | --- | --- | --- | --- | --- | --- | --- | --- | --- |
|  | 5320946 | -7.835 | -49.53 | -14.04 | 4.05 | -1.48 | -7.8 | -4.39 | 12.69 |
|  | 5280862 | -7.813 | -45.34 | -11.95 | 4.72 | -1.35 | -6.27 | -4.66 | 14.89 |
|  | 5280863 | -7.648 | -42.09 | -12.94 | 3.53 | -1.36 | -5.68 | -4.83 | 16.46 |
|  | 5282160 | -7.548 | -47.93 | -35.28 | 5.34 | -4.07 | -9.88 | -3.31 | 35.39 |
|  | 5280443 | -7.489 | -39.67 | -9.98 | 4.48 | -1.35 | -5.09 | -4.88 | 13.62 |
|  | 5320462 | -7.383 | -46.7 | -24.39 | 3.1 | -1.73 | -11.02 | -3.18 | 25.17 |
|  | 5280804 | -7.331 | -44.77 | -9.6 | 2.05 | -2.87 | -10.85 | -2.67 | 28.01 |
|  | 5282102 | -7.226 | -50.61 | -11.26 | 2.98 | -2.26 | -11.52 | -2.54 | 23.26 |
|  | 5280637 | -7.161 | -44.92 | -36.17 | 5.52 | -2.87 | -9.78 | -2.85 | 37.88 |
|  | 5281654 | -7.153 | -44.74 | -13.02 | 3.87 | -1.38 | -6.31 | -4.74 | 17.57 |
|  | 5280445 | -7.133 | -40.12 | -14.13 | 0.77 | -2.57 | -4.73 | -3.58 | 16.17 |
|  | 5280699 | -7.105 | -45.85 | -27.6 | 3.75 | -1.82 | -11.16 | -3.09 | 29.66 |
|  | 5280343 | -7.037 | -41.32 | -12.7 | 3.72 | -1.37 | -5.6 | -4.76 | 17.93 |
|  | 5281691 | -7.016 | -52.39 | -24.72 | 2.76 | -1.93 | -9.93 | -4.33 | 20.26 |
|  | 5281608 | -6.978 | -52.7 | -25.51 | 1.52 | -1.81 | -10.96 | -3.16 | 28.09 |
|  | 5748611 | -6.955 | -44.36 | -25.85 | 7.25 | -2.31 | -9.78 | -3.87 | 28.99 |
|  | 5379563 | -6.923 | -47.58 | -13.68 | 1.69 | -1.74 | -10.69 | -3.14 | 20.52 |
|  | 5281678 | -6.857 | -45.44 | -25.04 | 2.75 | -2.38 | -8.28 | -4.33 | 34.25 |
|  | 74208821 | -6.801 | -64.74 | -49.74 | 2.81 | -4.05 | -11.45 | -2.92 | 44.93 |
|  | 5318214 | -6.772 | -43.55 | -7.34 | 3.37 | -1.81 | -6.87 | -3.69 | 11.62 |
|  | 5315263 | -6.758 | -41.61 | -17.55 | 7.73 | -1.94 | -11.77 | -3.13 | 27.15 |
|  | 5320351 | -6.745 | -49.34 | -22 | 8.4 | -1.71 | -11.25 | -2.48 | 28.21 |
|  | 5316832 | -6.664 | -51.96 | -11.89 | 8.37 | -1.45 | -10.86 | -3.96 | 12.89 |
|  | 11230 | -6.627 | -26.49 | -12.77 | 1.98 | -0.49 | -12.18 | 0 | 9.28 |
|  | 5377945 | -6.627 | -44.15 | -17.41 | 1.99 | -1.56 | -8.53 | -4.1 | 27.3 |
|  | 162464 | -6.626 | -41.84 | -24.51 | 3.98 | -1.7 | -9.5 | -3.01 | 28.6 |
|  | 160237 | -6.583 | -42.75 | -14.39 | 0.5 | -1.76 | -8.72 | -3.74 | 20.75 |
|  | 5280666 | -6.54 | -38.11 | -21.44 | 1.8 | -1.32 | -7.31 | -3.06 | 26.41 |
|  | 97214 | -6.462 | -33.65 | -16.54 | 6.31 | -1.79 | -9.17 | -3.13 | 27.67 |
|  | 44259809 | -6.405 | -57.52 | -30.15 | 1.85 | -3 | -10.92 | -3.14 | 33.31 |
|  | 5280460 | -6.377 | -40.54 | -8.76 | 0.65 | -1.18 | -9.1 | -3.05 | 9.11 |
|  | 21632759 | -6.271 | -29.43 | -5.12 | 1.09 | -0.62 | -10.82 | 0 | 10.13 |
|  | 12046149 | -6.243 | -36.04 | -6.61 | 1.96 | -0.5 | -13.91 | 0 | 13.06 |
|  | 10364 | -6.188 | -36.09 | -7.78 | 0.94 | -0.57 | -11.26 | -1.25 | 9.64 |
|  | 5281603 | -6.182 | -40.73 | -15.37 | 3.07 | -1.55 | -8.81 | -4.33 | 30.36 |
|  | 326 | -6.039 | -33.77 | -3.22 | 0.41 | -0.27 | -11.01 | -1.09 | 7.1 |
|  | 10657 | -6.001 | -34.39 | -1.98 | 1.38 | 0 | -13.78 | 0 | 9.77 |
|  | 94266 | -5.996 | -33.51 | -8.15 | 2.06 | -0.61 | -6.76 | 0 | 10.83 |
|  | 6989 | -5.971 | -35.7 | -12.53 | 3.75 | -0.62 | -11.31 | -1.18 | 11.53 |
|  | 8417 | -5.952 | -35.95 | -15.61 | 1.14 | -1.01 | -7.77 | -2.15 | 18.14 |
|  | 853433 | -5.902 | -39.08 | -10.48 | 0.81 | -1.09 | -11.45 | -1.3 | 7.1 |
|  | 10398656 | -5.881 | -37.74 | -5.09 | 0.98 | -0.01 | -15.06 | 0 | 14.63 |
|  | 65030 | -5.88 | -29.27 | -15.37 | 1.76 | -1.57 | -8.56 | 0 | 24.59 |
|  | 439514 | -5.843 | -37.22 | -18.29 | 5.15 | -2.32 | -10.97 | -4.47 | 34.05 |
|  | 93081 | -5.811 | -32.19 | -3.11 | 0.89 | 0 | -11.55 | 0 | 11.69 |
|  | 12306048 | -5.773 | -36.68 | -1.29 | 0.44 | 0 | -14.91 | 0 | 10.32 |
|  | 102553 | -5.753 | -27.7 | -6.68 | -0.16 | -0.59 | -4.95 | 0 | 10.83 |
|  | 20197 | -5.748 | -30.97 | -3.02 | -0.52 | 0 | -11.97 | -1.2 | 11.02 |
|  | 5280863 | -5.742 | -25.59 | -23.11 | 2.97 | -1.38 | -5.58 | -4.95 | 42.93 |
|  | 17868 | -5.741 | -22.32 | -1.14 | 3.78 | 0 | -13.14 | 0 | 7.75 |
|  | 10703 | -5.723 | -31.11 | -2.2 | 0.48 | 0 | -11.61 | -1.07 | 9.31 |
|  | 7461 | -5.704 | -29.81 | -3.24 | 0.29 | 0 | -11.22 | 0 | 9.2 |
|  | 441005 | -5.699 | -36.58 | -1.58 | 0.86 | 0 | -14.81 | 0 | 10.47 |
|  | 5280443 | -5.693 | -26.45 | -39.37 | 1.61 | -1.77 | -6.5 | -3.19 | 52.49 |
|  | 5377945 | -5.675 | -33.02 | -40.37 | 0.07 | -2.32 | -8.43 | -3.36 | 50.22 |
|  | 5280862 | -5.673 | -24.52 | -26.97 | 3.65 | -1.31 | -5.81 | -5.06 | 48.63 |
|  | 7462 | -5.656 | -28.16 | -2.44 | 3.88 | 0 | -11.42 | 0 | 8.23 |
|  | 11000442 | -5.593 | -34.76 | -11.26 | 0.06 | -1.16 | -8.36 | 0 | 18.31 |
|  | 162222210 | -5.59 | -30.74 | -2.67 | -0.15 | 0 | -11.61 | -1.18 | 9.17 |
|  | 7463 | -5.575 | -30.24 | -6.8 | 0.21 | -0.06 | -8.27 | -2.57 | 11.59 |
|  | 323 | -5.561 | -19.19 | 18.24 | 5.59 | -1.07 | -8.72 | 0 | -1.9 |
|  | 126891 | -5.495 | -32.07 | -7.66 | 2.73 | -0.66 | -10.2 | 0 | 13.75 |
|  | 12814879 | -5.457 | -34.14 | -10.02 | 0.77 | -1.16 | -8.38 | 0 | 17.3 |
|  | 68827 | -5.443 | -31.61 | -11.03 | 0.62 | -0.62 | -8.06 | 0 | 14.3 |
|  | 636625 | -5.415 | -32.35 | -1.14 | 0.8 | 0 | -10.84 | 0 | 11.05 |
|  | 521334 | -5.4 | -36.9 | -46.02 | 3.41 | -2.98 | -8.29 | -3.14 | 50.57 |
|  | 5281678 | -5.375 | -12.08 | 22.92 | 1.48 | -0.52 | -10.63 | 0 | 6.01 |
|  | 578305 | -5.369 | -24.56 | -0.18 | 5.16 | 0 | -11.88 | 0 | 13.6 |
|  | 5317844 | -5.353 | -31.52 | -12.24 | 0.65 | -0.68 | -8 | 0 | 15 |
|  | 6543478 | -5.296 | -28.84 | -22.64 | 3.32 | -1.39 | -6.22 | -4.87 | 42.88 |
|  | 5281654 | -5.279 | -29.4 | -47.66 | 5.69 | -2.31 | -6.44 | -3.22 | 53.84 |
|  | 5280445 | -5.277 | -42.47 | -4.25 | 4.02 | -1.45 | -8.23 | -4.46 | 10.92 |
|  | 5320946 | -5.236 | -23.35 | -6.82 | 0.51 | -0.54 | -8.53 | 0 | 7.78 |
|  | 527032 | -5.188 | -21.82 | -6.98 | 0.89 | -0.56 | -7.26 | 0 | 7.37 |
|  | 101680 | -5.174 | -30.26 | -1.65 | 2.48 | 0 | -11.94 | 0 | 12 |
|  | 442393 | -5.163 | -26.76 | -2.56 | 1.92 | -0.26 | -11.15 | 0 | 7.5 |
|  | 1254 | -5.141 | -18.44 | -2.55 | 2.62 | 0 | -10.11 | 0 | 9.34 |
|  | 520384 | -5.141 | -25.97 | -41.66 | 2.23 | -1.77 | -6.94 | -3.17 | 57.85 |
|  | 5280666 | -5.131 | -25.01 | -8.85 | 3.53 | -0.66 | -9.07 | 0 | 11.74 |
|  | 42626428 | -5.103 | -26.65 | -2.65 | 0.36 | -0.25 | -8.5 | 0 | 8.22 |
|  | 17100 | -5.062 | -24.11 | -8.33 | 0.77 | -0.61 | -8.32 | 0 | 9.08 |
|  | 102667 | -5.03 | -42.49 | -6.82 | 1.84 | -2.14 | -7.55 | -4.59 | 12.26 |
|  | 5281691 | -5.025 | -32.25 | -38.22 | 0.88 | -1.89 | -10.38 | -3.09 | 59.77 |
|  | 5379563 | -5.012 | -19.75 | -1.64 | 8.07 | 0 | -15.06 | 0 | 10.85 |
|  | 19725 | -5.012 | -19.75 | -1.64 | 8.07 | 0 | -15.06 | 0 | 10.85 |
|  | 6432119 | -5.012 | -25.3 | -7.54 | -0.07 | -0.84 | -7.19 | 0 | 8.47 |
|  | 29025 | -5.004 | -20.95 | -2.45 | 10.06 | 0 | -14.09 | 0 | 9.75 |
|  | 5281515 | -4.98 | -23.32 | -8.6 | 0.38 | -0.59 | -7.28 | 0 | 8.83 |
|  | 64685 | -4.974 | -24.11 | -1.87 | 6.18 | 0 | -13.75 | 0 | 11.42 |
|  | 5281522 | -4.958 | -23.03 | -11.77 | 0.23 | -0.6 | -4.32 | 0 | 11.96 |
|  | 61130 | -4.957 | -11.22 | -1.88 | 3.79 | 0 | -12.07 | 0 | 9.18 |
|  | 6654 | -4.943 | -22.99 | -5.55 | 2.49 | -0.58 | -8.83 | 0 | 6.99 |
|  | 89664 | -4.939 | -35.7 | -0.8 | -0.06 | -0.47 | -11.36 | -2.17 | 8.07 |
|  | 7651 | -4.924 | -25.06 | -22.26 | 3.18 | -1.39 | -5.51 | -4.89 | 43.56 |
|  | 5280343 | -4.907 | -19.73 | -0.95 | 6.39 | 0 | -17.37 | 0 | 11.73 |
|  | 6432312 | -4.892 | -24.67 | -7.93 | 0.19 | -0.88 | -7.86 | 0 | 8.16 |
|  | 10582 | -4.873 | -18.23 | -6.3 | 2.48 | -0.1 | -9.04 | 0 | 10.64 |
|  | 92784 | -4.86 | -17.89 | -3.76 | 2.92 | -0.01 | -11.54 | 0 | 15.15 |
|  | 92231 | -4.847 | -20.32 | -8.3 | 1.81 | -0.83 | -8.68 | 0 | 24.44 |
|  | 14356591 | -4.828 | -35.32 | -7.9 | 2.9 | -0.61 | -13.7 | -2.14 | 21.74 |
|  | 5991 | -4.825 | -23.33 | -9.08 | 0.53 | -0.84 | -7.74 | 0 | 10.52 |
|  | 12315160 | -4.805 | -24.2 | -8.06 | 0.21 | -0.78 | -5.17 | 0 | 8.64 |
|  | 2758 | -4.799 | -19.24 | -1.81 | 1.84 | 0 | -11.73 | 0 | 7.88 |
|  | 101629835 | -4.791 | -18.65 | -3.38 | 4.14 | -0.09 | -10.09 | 0 | 12.6 |
|  | 6427504 | -4.772 | -22.48 | -9.48 | 1.83 | -0.51 | -5.74 | 0 | 12.96 |
|  | 6431301 | -4.769 | -19.54 | -0.51 | 2.31 | 0 | -11.96 | 0 | 8.42 |
|  | 18818 | -4.763 | -23.22 | -7.03 | -0.03 | -1.14 | -6.15 | 0 | 9.67 |
|  | 10545 | -4.751 | -29.75 | -4.72 | 5.92 | -0.41 | -15.09 | 0 | 22.05 |
|  | 92156 | -4.732 | -19.78 | 34.4 | 2.31 | -1.22 | -13.66 | 0 | -8.6 |
|  | 10494 | -4.708 | -31.81 | -9.49 | 3.96 | -0.56 | -13.04 | 0 | 13.89 |
|  | 101679337 | -4.706 | -25.63 | -5.1 | 1.81 | -0.23 | -10.06 | 0 | 10.71 |
|  | 7439 | -4.704 | -19.14 | -1.17 | 6.25 | 0 | -12.42 | 0 | 11.6 |
|  | 21775138 | -4.655 | -24.29 | -2.59 | 0.9 | -0.43 | -7.17 | 0 | 10.16 |
|  | 10899521 | -4.649 | -17.72 | -8.74 | 0.49 | -0.58 | -3.6 | 0 | 12.15 |
|  | 2537 | -4.64 | -21.99 | -4.99 | -0.2 | -0.54 | -7.64 | 0 | 7.97 |
|  | 88302 | -4.626 | -15.72 | -0.58 | 2.76 | -0.19 | -10.49 | 0 | 14.48 |
|  | 1742210 | -4.614 | -21.78 | 11.75 | 2.02 | -2 | -7.48 | 0 | 2.61 |
|  | 10922465 | -4.596 | -26.5 | -25.18 | 3.02 | -1.51 | -9.21 | -4.27 | 47.61 |
|  | 5281603 | -4.596 | -29.92 | -10.92 | 3.08 | -0.74 | -11.48 | 0 | 10.39 |
|  | 5352516 | -4.589 | -19.99 | 0.24 | 0.3 | 0 | -8.25 | 0 | 7.08 |
|  | 14896 | -4.583 | -19.45 | -3.91 | 1.24 | -0.52 | -5.65 | 0 | 10.06 |
|  | 84532 | -4.543 | -13.48 | -0.99 | 4.68 | 0 | -12.45 | 0 | 8.79 |
|  | 28930 | -4.529 | -34.69 | -4.81 | 4.05 | -0.6 | -17.33 | 0 | 24.57 |
|  | 5280794 | -4.519 | -37.96 | -4.27 | 0.33 | 0 | -12.75 | -1.98 | 9.07 |
|  | 3083613 | -4.457 | -33.07 | -14.46 | 2.85 | -1.13 | -8.71 | 0 | 11.77 |
|  | 11389649 | -4.455 | -34.3 | -12.65 | 1.99 | -1.03 | -11.62 | 0 | 11.55 |
|  | 5315406 | -4.385 | -35.51 | -6.28 | 1.85 | -0.54 | -12.34 | 0 | 8.65 |
|  | 10586 | -4.375 | -44.03 | -11.99 | 0.47 | -0.54 | -13.07 | 0 | 13.11 |
|  | 102368592 | -4.362 | -34.18 | -2.31 | 0.32 | -0.12 | -14.8 | 0 | 21.1 |
|  | 73170 | -4.306 | -40.88 | -19.19 | 2.48 | -2.16 | -10.92 | -3.34 | 34.61 |
|  | 5282102 | -4.284 | -24.53 | -5.3 | 6.87 | -0.16 | -13.01 | 0 | 12.92 |
|  | 524254 | -4.261 | -11.45 | -1.89 | 1.85 | 0 | -6.53 | 0 | 14.13 |
|  | 90658163 | -4.244 | -15.92 | -1.37 | 6.28 | 0 | -14.89 | 0 | 11.49 |
|  | 6918391 | -4.164 | -26.9 | -9.23 | 2.52 | -0.34 | -13.28 | 0 | 12.66 |
|  | 12308602 | -4.163 | -13.1 | -2.37 | 2.46 | 0 | -8.41 | 0 | 8.86 |
|  | 6616 | -4.161 | -33.21 | -45.71 | 4.89 | -4.52 | -9.91 | -2.5 | 62.15 |
|  | 5280804 | -4.158 | -27.47 | -4.51 | 1.41 | -0.06 | -12.25 | 0 | 10.83 |
|  | 68346 | -4.13 | -25.48 | -1.45 | 1.08 | 0 | -10.65 | 0 | 8.21 |
|  | 22311 | -4.113 | -20.26 | -0.41 | 0.29 | 0 | -9.4 | 0 | 9.44 |
|  | 44567200 | -4.089 | -33.8 | -2.2 | 1.07 | -0.12 | -15.48 | 0 | 21.4 |
|  | 73145 | -4.086 | -34.09 | -2.53 | 1.61 | -0.07 | -13.81 | 0 | 19.5 |
|  | 111220 | -4.069 | -23.77 | 0.51 | 1.14 | 0 | -10.22 | 0 | 8.89 |
|  | 5281520 | -4.052 | -17.13 | -0.58 | 0.56 | 0 | -7.85 | 0 | 14.61 |
|  | 91723653 | -4.016 | -22.3 | -5.9 | 6.03 | -0.54 | -13.3 | 0 | 12.46 |
|  | 637566 | -3.953 | -20.08 | -0.07 | 0.08 | 0 | -9.63 | 0 | 10.39 |
|  | 42608158 | -3.934 | -34.25 | -2.89 | 0.78 | -0.12 | -14.12 | 0 | 20.79 |
|  | 12306155 | -3.908 | -25.73 | -6.51 | 3.11 | -0.55 | -11.64 | 0 | 10.96 |
|  | 14485465 | -3.893 | -24.08 | -9.75 | 2.02 | -0.55 | -8.07 | 0 | 11.53 |
|  | 162222210 | -3.832 | -34.27 | -9.34 | 3.42 | -0.47 | -8.7 | 0 | 11.21 |
|  | 6549 | -3.83 | -35.83 | -9.24 | 8.01 | -1.6 | -17.38 | 0 | 18.88 |
|  | 5370101 | -3.791 | -17.19 | -0.9 | 0.32 | 0 | -6 | 0 | 7.36 |
|  | 1549025 | -3.782 | -30.52 | -1.3 | 0.97 | -0.18 | -12.07 | 0 | 18.05 |
|  | 5205968 | -3.774 | -27.54 | -4.34 | 3.08 | -0.44 | -12.43 | 0 | 8.04 |
|  | 124349839 | -3.658 | -23.8 | -1.97 | 2.3 | 0 | -14.23 | 0 | 8.67 |
|  | 6448 | -3.623 | -31.92 | -2.8 | 1.76 | 0 | -13.38 | 0 | 8.07 |
|  | 119242 | -3.596 | -25.47 | -3.37 | 2.83 | 0 | -13.1 | 0 | 8.17 |
|  | 6538431 | -3.576 | -29.33 | -3.36 | 0.77 | 0 | -11.06 | 0 | 17.82 |
|  | 5281553 | -3.485 | -31.12 | -6.25 | 3.61 | -0.65 | -12.29 | 0 | 11.69 |
|  | 5320377 | -3.37 | -12.77 | -17.63 | 0.55 | -0.5 | -3.81 | -4.79 | 43.38 |
|  | 519872 | -3.349 | -30.47 | -7.44 | 2.11 | -0.63 | -13.37 | 0 | 22.2 |
|  | 91472 | -3.318 | -24.01 | -2.8 | 7.94 | 0 | -13.69 | 0 | 9.1 |
|  | 10975 | -3.177 | -30.15 | -6.31 | 3.42 | -1.44 | -9.47 | 0 | 12.38 |
|  | 5280460 | -2.877 | -18.29 | -6.28 | 0.21 | -0.44 | -1.66 | 0 | 4.37 |
|  | 222284 | -2.779 | -32.41 | -14.71 | 0.62 | -1.53 | -12.49 | 0 | 22.67 |
|  | 68406 | -2.751 | -24.13 | -2.61 | 0.87 | 0 | -11.46 | 0 | 9.19 |
|  | 31253 | -2.641 | -35.79 | -3.61 | 1.68 | -0.45 | -14.44 | 0 | 14.51 |
|  | 126891 | -2.637 | -33.31 | -2.1 | 3.3 | 0 | -17.37 | 0 | 10.02 |
|  | 6584 | -2.45 | -35.72 | -10.48 | 3.25 | -0.56 | -15.14 | 0 | 18.25 |
